# Supplementary material for: Twist1 induces chromosomal instability (CIN) in colorectal cancer cells
Source: PubMed Central journal article supplement (PMC7322571; doi:10.1093/hmg/ddaa076), 2020-04-27
Supplement: supplementary_figures_ddaa076.pdf [file supplementary_figures_ddaa076.pdf]

# Supplementary Figures

## Figure S1

### Cell line validation

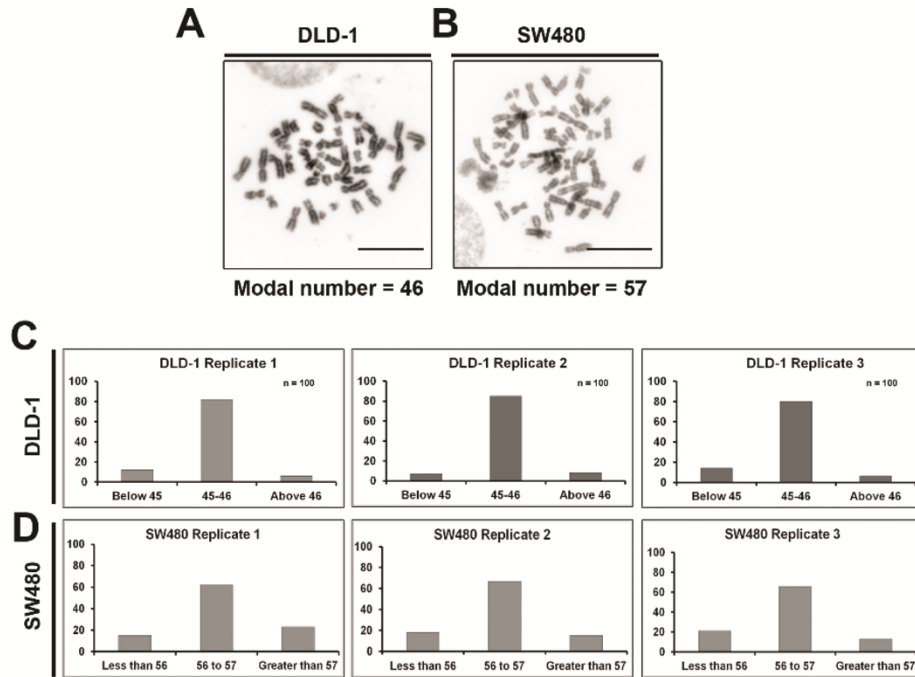

### Fluorescence Assisted Cell Sorting

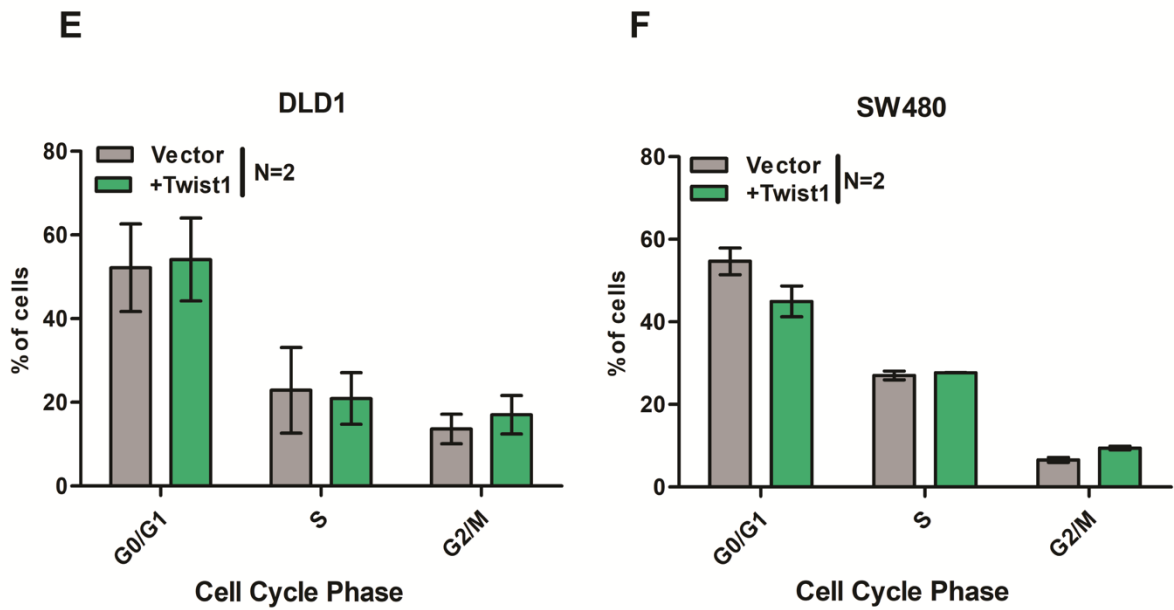

**Figure S1: Cell line validation by chromosome counting and FACS**

**(A-B)** Representative metaphase spreads of colorectal cancer cell lines DLD1 and SW480.

**(C)** Quantification of chromosome numbers from metaphase spreads showing modal chromosome numbers of 44-45 for DLD1 cells. Data from N=3 independent biological replicates. Scale bar ~10

µm. **(D)** Quantification of chromosome numbers from metaphase spreads showing modal chromosome number of 56-57 for SW480 cells. Data from N=3 independent biological replicates.

**(E-F)** Quantification of distribution of cells across cell cycle phases from Fluorescence Assisted Cell Sorting shows no significant effect of Twist1 overexpression on cell cycle. Data quantified from N=2 independent biological replicates (N=2, Mean with Range).

## Figure S2 Nuclear and Mitotic Aberrations

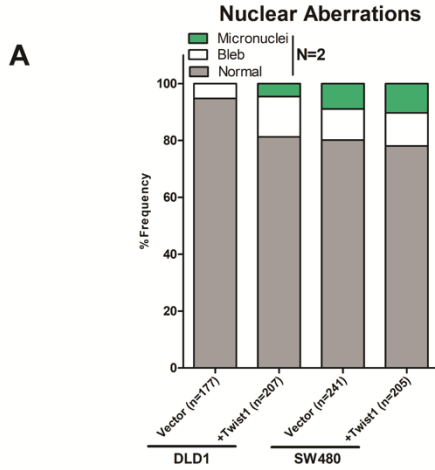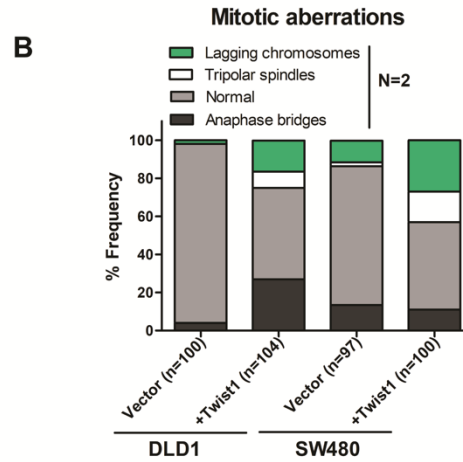

**Table S1**

|             | DLD1   |         | SW480  |         |
|-------------|--------|---------|--------|---------|
|             | Vector | +Twist1 | Vector | +Twist1 |
| Normal      | 95%    | 81%     | 80%    | 78%     |
| Blebs       | 5%     | 14%     | 11%    | 12%     |
| Micronuclei | 0%     | 5%      | 9%     | 10%     |

**Table S2**

|                     | DLD1   |         | SW480  |         |
|---------------------|--------|---------|--------|---------|
|                     | Vector | +Twist1 | Vector | +Twist1 |
| Lagging Chromosomes | 2%     | 16%     | 11%    | 27%     |
| Anaphase Bridges    | 4%     | 27%     | 14%    | 11%     |
| Tri-polar Spindles  | 0%     | 9%      | 2%     | 16%     |
| Normal Anaphases    | 94%    | 48%     | 73%    | 46%     |

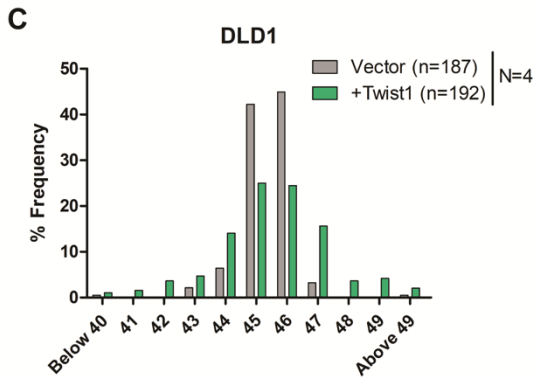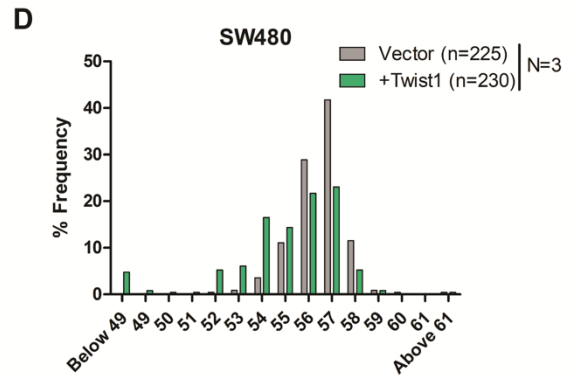

**Table S3**

|         | DLD1 |       |     | SW480 |       |     |
|---------|------|-------|-----|-------|-------|-----|
|         | <45  | 45-46 | >46 | <56   | 56-57 | >57 |
| Vector  | 9%   | 87%   | 4%  | 16%   | 71%   | 13% |
| +Twist1 | 25%  | 49%   | 26% | 49%   | 45%   | 6%  |

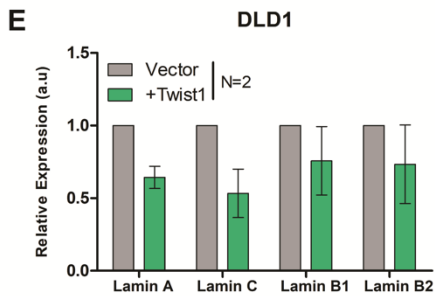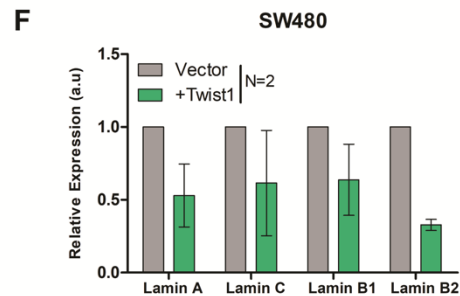

## **Figure S2: Nuclear and Mitotic Aberrations**

**(A)** Quantification of nuclear aberrations plotted with frequency of normal cells observed across both cell lines (N=2, Mean). **(B)** Quantification of mitotic aberrations plotted with frequency of normal cells observed across both cell lines (N=2, Mean). **(Table S1)** Table representing the average % frequency changes in nuclear aberrations observed upon Twist1 overexpression across cell lines. Upon Twist1 overexpression, the % frequency of normal cells decreases, while the % frequency of blebs and micronuclei increases across cell lines. Data quantified from two independent biological replicates (N=2, Mean). **(Table S2)** Table representing the average % frequency changes in mitotic aberrations observed upon Twist1 overexpression across cell lines. Upon Twist1 overexpression, the % frequency of normal cells decreases, while the % frequency of anaphase bridges, lagging chromosomes and tripolar spindles increases in DLD1 cells. The % frequency of anaphase bridges decreases, while that of lagging chromosomes and tripolar spindles increases in SW480 cells. Data quantified from two independent biological replicates (N=2, Mean). **(C)** Representative histograms of chromosome count upon Twist1 overexpression across DLD1 cell line. Data quantified from n>180 independent metaphase spreads collected from four independent biological replicates (N=4). **(D)** Representative histograms of chromosome count upon Twist1 overexpression across SW480 cell line. Data quantified from n> 200 independent metaphase spreads collected from three independent biological replicates (N=3). **(Table S3)** Table representing the % frequency of gains and losses as compared to normal cells upon Twist1 overexpression. **(E-F)** Quantification of lamin levels upon Twist1 overexpression in **(E)** DLD1 **(F)** SW480, **(Fig.2I)**. Quantification of band intensities from two independent biological replicates, normalized to GAPDH (N=2, Mean with Range).

**Figure S3**

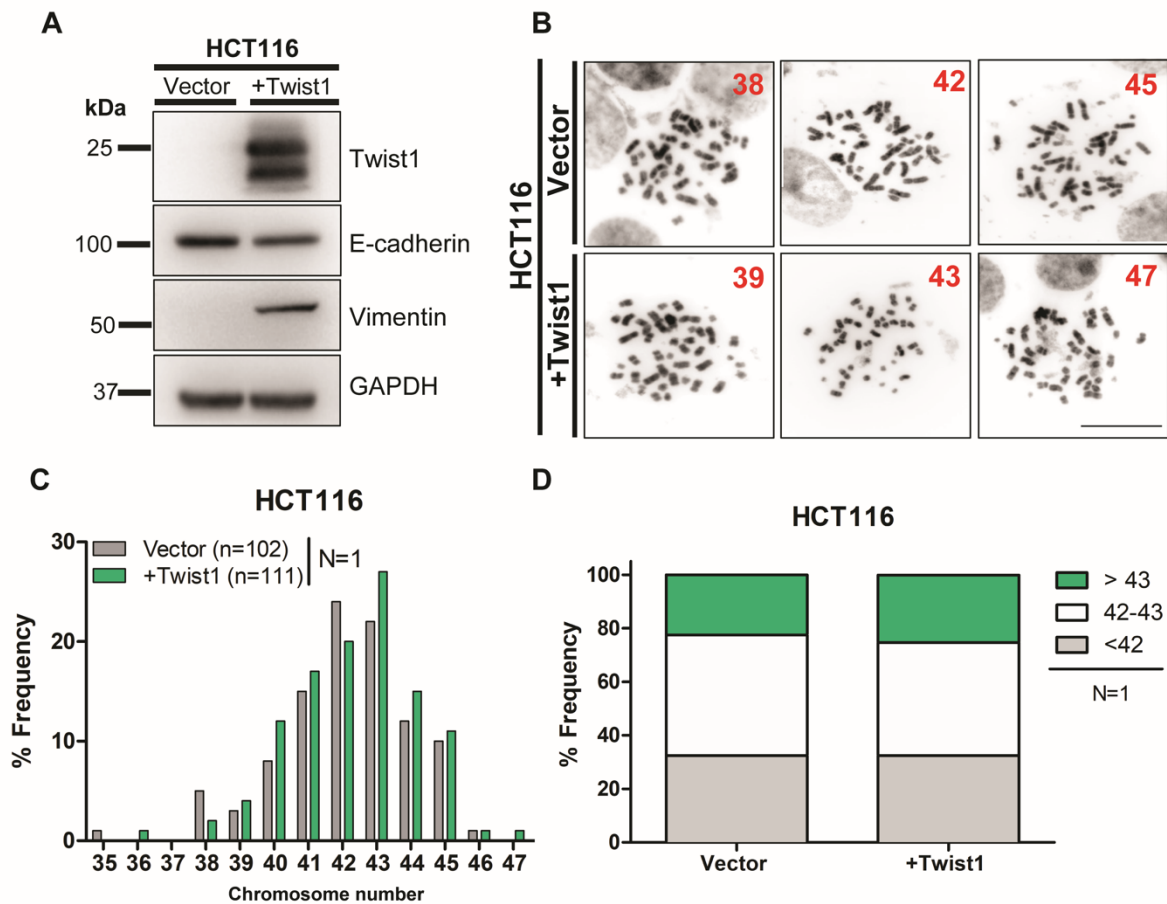

**Table S4**

|                | <42 | 42-43 | 44-45 | <45 |
|----------------|-----|-------|-------|-----|
| <b>Vector</b>  | 32% | 45%   | 22%   | 1%  |
| <b>+Twist1</b> | 32% | 42%   | 23%   | 2%  |

**Figure S3: Twist1 overexpression in HCT116 colorectal cancer cells**

**(A)** Representative immunoblot showing EMT induction upon Twist1 overexpression. E-cadherin shows a marginal decrease, while Vimentin shows a concomitant increase in levels in HCT116 cells. **(B)** Representative images of metaphase spreads derived from HCT116 upon Twist1 overexpression. Scale bar ~20  $\mu\text{m}$ . **(C)** Histogram showing quantification of metaphase spreads derived from cells treated with vector control (N=1, n=102) and Twist1 overexpression respectively (N=1, n=111). **(D)** Quantification of whole chromosomal gains and losses in HCT116 cells. (Data quantified from n=100 independent metaphase spreads collected from N=1 single experiment). **(Table S4)** Table representing percentage frequency of whole chromosomal gains and losses in HCT116 cells upon Twist1 overexpression.

**Figure S4**

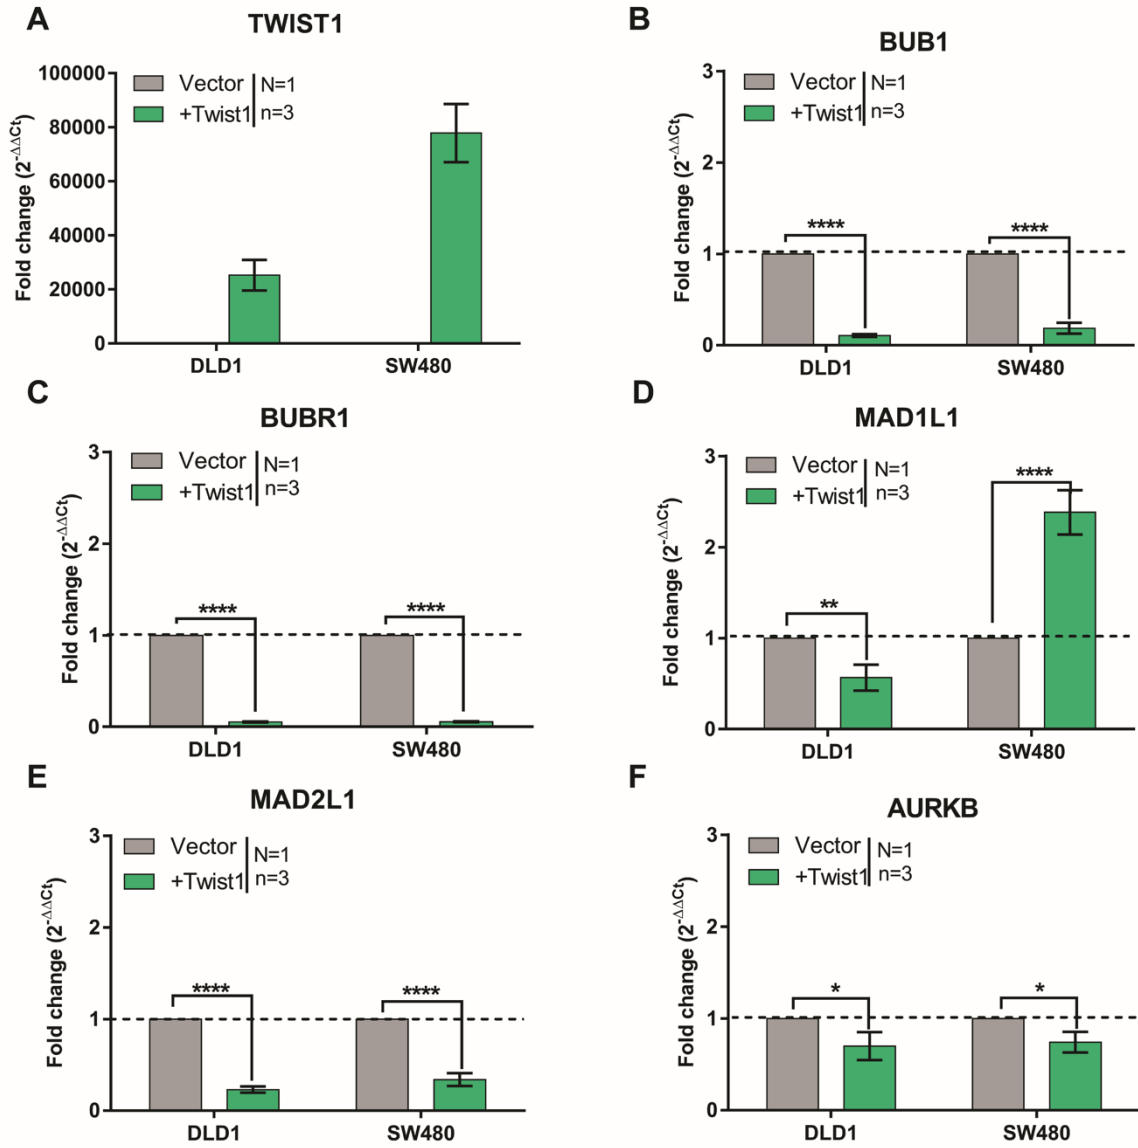

**Figure S4: Effect of Twist1 overexpression on transcript levels of checkpoint genes**

(A) Gene expression levels determined by RT-PCR of Twist1 upon Twist1 overexpression in DLD1 and SW480 cells, normalized to vector control. (B-F) Gene expression profiling of checkpoint genes determined by RT-PCR for checkpoint genes upon Twist1 overexpression in DLD1 & SW480. Data normalised to its respective vector control. (Data quantified from N=1 single experiment that include n=3 independent technical replicates, unpaired t-test, Mean±SD, \*P < 0.05, \*\*P < 0.01, \*\*\*P < 0.001 and \*\*\*\*P < 0.0001).



Figure S5

A

Protein-Protein interactions

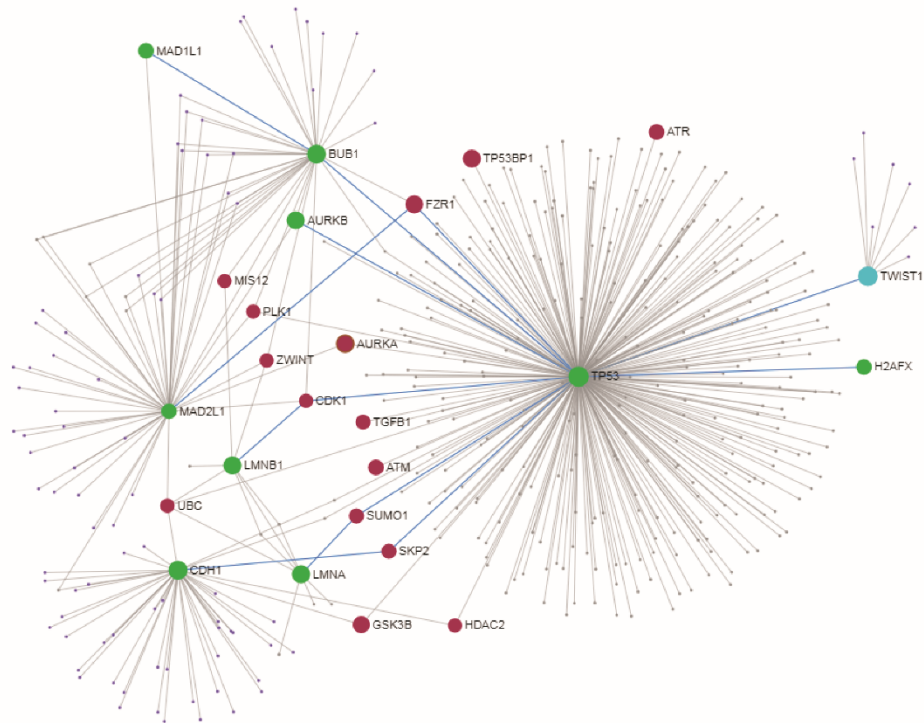

B

TF-Gene interactions

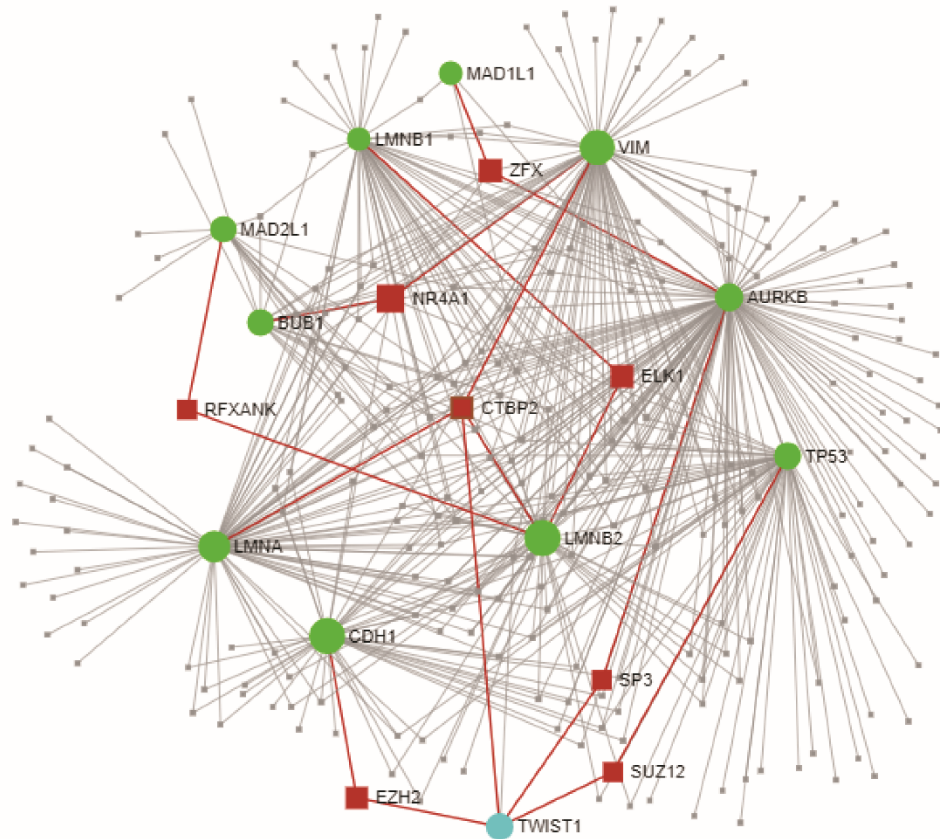

**Figure S5: Correlation between levels of Twist1, EMT and CIN factors**

**(A)** Generic Protein-Protein interactions of Twist1 & other proteins examined in this study (E-cadherin, Vimentin, Bub1, BubR1, Mad1, Mad2, Aurora B kinase, p53, LaminA/C, LaminB1, LaminB2) generated using NetworkAnalyst. Blue line: Candidate and key protein-protein interactions in the context of Twist1, EMT and CIN factors. Gray line: All other protein-protein interactions. ● Candidate EMT and CIN factors reported in this study

● Potential protein-protein interactors connecting ● Twist1 with EMT, CIN and DNA damage.

**(B)** Transcription factor-Gene interactions between TWIST1 & other target genes (CDH1, VIM, BUB1, MAD1L1, MAD2L1, AURKB, TP53, LMNA, LMNB1 and LMNB2) examined in this study generated using NetworkAnalyst. ● TWIST1 ● Input candidate genes ■ transcription factor enrichment on genes derived from ENCODE ChIP-seq data.

**Table S5 Analysis of Twist1 occupancy from ChIP seq data of HMLE cells**

| Gene Category    | Gene Name | Occupancy | Chromosome | Start     | End       | Annotation                             | Distance to TSS (bp) |
|------------------|-----------|-----------|------------|-----------|-----------|----------------------------------------|----------------------|
| EMT              | CDH1      | +         | Chr.16     | 67298818  | 67299408  | Intergenic                             | -29583               |
|                  | CDH1      | +         | Chr.16     | 67328548  | 67328884  | promoter-TSS (NM_004360)               | +20                  |
|                  | CDH1      | +         | Chr.16     | 67377982  | 67378379  | intron (NM_004360, intron 2 of 15)     | +49484               |
|                  | VIM       | -         | Chr.10     | N.A.      | N.A.      | N.A.                                   | N.A.                 |
| Checkpoint       | BUB1      | -         | Chr.2      | N.A.      | N.A.      | N.A.                                   | N.A.                 |
|                  | BUBR1     | -         | Chr.15     | N.A.      | N.A.      | N.A.                                   | N.A.                 |
|                  | MAD1L1    | +         | Chr.7      | 2201955   | 2202527   | intron (NM_001013836, intron 10 of 18) | +36868               |
|                  | MAD1L1    | +         | Chr.7      | 2122201   | 2122623   | intron (NM_001013836, intron 11 of 18) | +116697              |
|                  | MAD2L1    | +         | Chr.4      | 121632168 | 121632386 | Intergenic                             | -424816              |
|                  | AURKB     | -         | Chr.17     | N.A.      | N.A.      | N.A.                                   | N.A.                 |
|                  | TP53      | -         | Chr.17     | N.A.      | N.A.      | N.A.                                   | N.A.                 |
| Nuclear Envelope | LMNA      | +         | Chr.1      | 154339840 | 154340272 | intron (NM_001282625, intron 3 of 12)  | -11029               |
|                  | LMNA      | +         | Chr.1      | 154360004 | 154360693 | intron (NM_005572, intron 1 of 9)      | -2184                |
|                  | LMNA      | +         | Chr.1      | 154365724 | 154366780 | intron (NM_001282624, intron 2 of 10)  | +3720                |
|                  | LMNA      | +         | Chr.1      | 154355937 | 154356303 | intron (NM_005572, intron 1 of 9)      | +5035                |
|                  | LMNB1     | -         | Chr.5      | N.A.      | N.A.      | N.A.                                   | N.A.                 |
|                  | LMNB2     | +         | Chr.19     | 2404030   | 2404390   | intron (NM_032737, intron 1 of 11)     | +3756                |

**Table S5** ChIP-Sequencing analyses of Twist1 occupancy from HMLE (human mammary epithelial) cells upon Twist1 overexpression.

Figure S6

A

Gene ontology for genes with Twist binding at promoter  $\pm$  1kbp

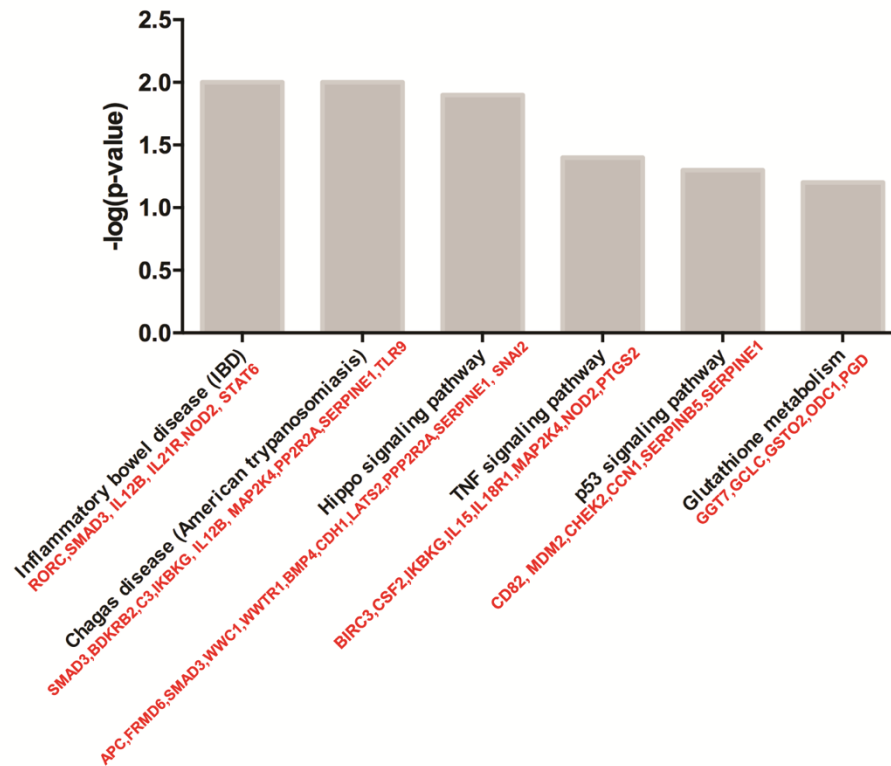

B

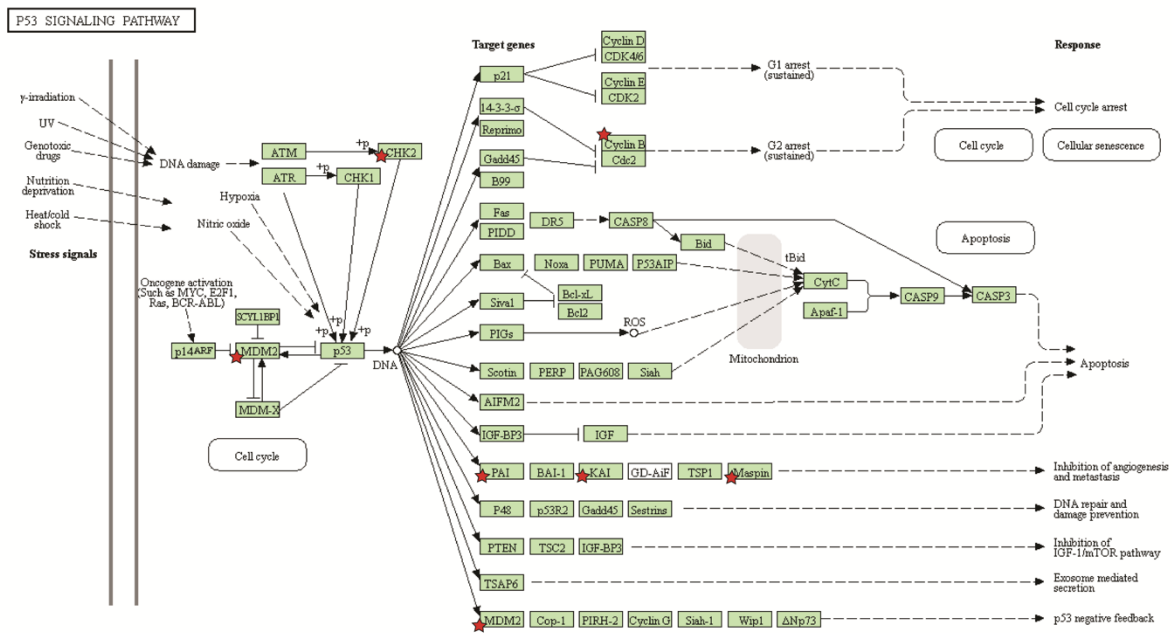

**Figure S6: Twist1 is enriched on promoters of genes in the p53 signaling pathway**

**(A)** Gene Ontology analysis of genes that show Twist1 occupancy enriched within (-1kbp to +1kbp) of the promoter region using DAVID Bioinformatics Resources 6.8. **(B)** p53 pathway from KEGG. Red stars indicate genes of the p53 pathway showing Twist1 occupancy in their promoter region.
